# Supplementary material for: Genetic Variants in PGE2 Receptors Modulate the Risk of Nephrosclerosis and Clinical Outcomes in These Patients
Source: MDPI journal article supplement (doi:10.3390/jpm11080772), 2021-08-06
Supplement: s1 [file s1]

## SUPPLEMENTARY TABLES

**Suppl Table S1.** Univariate analysis of the association of *PTGER* polymorphisms with the risk of nephrosclerosis in each model of inheritance. Significant p-values are in boldface type.

|               |             | Model of inheritance |          |           |              |              |
|---------------|-------------|----------------------|----------|-----------|--------------|--------------|
|               | SNP         | codominant           | dominant | recessive | overdominant | log-additive |
| <i>PTGER1</i> | rs11668633  | 0.75884              | 0.77760  | 0.56719   | 0.54001      | 0.97301      |
|               | rs2241362   | 0.38724              | 0.61364  | 0.17423   | 0.90506      | 0.41556      |
|               | rs2241360   | 0.35318              | 0.18480  | 0.40117   | 0.27649      | 0.15263      |
|               | rs28364039  | 0.98331              | 0.93266  | 0.86195   | 0.95787      | 0.91098      |
|               | rs11671086  | 0.78023              | 0.48177  | 0.78103   | 0.61606      | 0.52344      |
|               | rs3760702   | 0.34895              | 0.93874  | 0.16229   | 0.37538      | 0.44732      |
| <i>PTGER2</i> | rs111907219 | 0.62194              | 0.44091  | 0.71237   | 0.35015      | 0.58027      |
|               | rs1254585   | 0.56534              | 0.30258  | 0.98466   | 0.29732      | 0.39426      |
|               | rs17125344  | 0.99172              | 0.95941  | 0.91441   | 0.93908      | 0.98013      |
|               | rs708499    | 0.54298              | 0.58061  | 0.28866   | 0.84222      | 0.42006      |
|               | rs2229187   | 0.45431              |          |           |              |              |
|               | rs17197     | 0.90490              | 0.87666  | 0.65897   | 0.96024      | 0.80745      |
|               | rs45461592  | 0.73140              | 0.76635  | 0.44089   | 0.87579      | 0.67454      |
| <i>PTGER3</i> | rs61777096  | 0.69711              | 0.39873  | 0.72896   | 0.46631      | 0.40758      |
|               | rs6656853   | 0.22879              | 0.26813  | 0.10920   | 0.95147      | 0.11353      |
|               | rs6424406   | 0.69942              | 0.48404  | 0.57890   | 0.53235      | 0.44777      |
|               | rs7540868   | 0.33687              | 0.14452  | 0.49015   | 0.44038      | 0.17930      |
|               | rs35226859  | 0.14827              | 0.25387  | 0.06180   | 0.88256      | 0.07940      |
|               | rs7533733   | 0.80460              | 0.56478  | 0.62235   | 0.82791      | 0.50965      |

|            |         |         |         |                |         |
|------------|---------|---------|---------|----------------|---------|
| rs12119442 | 0.27631 | 0.11306 | 0.52493 | 0.15964        | 0.11223 |
| rs1409986  | 0.39305 | 0.19057 | 0.56876 | 0.21833        | 0.17597 |
| rs17481440 | 0.46690 | 0.21714 | 0.79410 | 0.23225        | 0.23142 |
| rs1536537  | 0.13077 | 0.88165 | 0.06593 | 0.09026        | 0.31773 |
| rs1327449  | 0.72680 | 0.78688 | 0.42534 | 0.95913        | 0.61560 |
| rs1536261  | 0.33221 | 0.61459 | 0.13788 | 0.62693        | 0.27157 |
| rs4649932  | 0.87691 | 0.99927 | 0.62422 | 0.80415        | 0.84596 |
| rs11209708 | 0.06833 | 0.05055 | 0.38728 | <b>0.02901</b> | 0.09771 |
| rs72932181 | 0.60720 | 0.32073 | 0.76690 | 0.34812        | 0.32085 |
| rs35702222 | 0.94790 | 0.76571 | 0.83110 | 0.83286        | 0.74416 |
| rs1409166  | 0.38018 | 0.33409 | 0.20797 | 0.90573        | 0.18711 |
| rs1409165  | 0.25963 | 0.11621 | 0.39746 | 0.18475        | 0.10055 |
| rs1359835  | 0.42374 | 0.27236 | 0.29296 | 0.85923        | 0.19013 |
| rs1327464  | 0.27669 | 0.56706 | 0.21431 | 0.17828        | 0.88188 |
| rs6659643  | 0.96984 | 0.95340 | 0.80472 | 0.99511        | 0.91687 |
| rs4420040  | 0.32037 | 0.46678 | 0.13718 | 0.70245        | 0.19717 |
| rs2182325  | 0.23612 | 0.13217 | 0.23142 | 0.41876        | 0.08954 |
| rs11209714 | 0.56675 | 0.61848 | 0.29237 | 0.79483        | 0.37189 |
| rs875727   | 0.66821 | 0.37167 | 0.92315 | 0.37485        | 0.39568 |
| rs1327466  | 0.25617 | 0.17715 | 0.55090 | 0.10978        | 0.31932 |
| rs17541777 | 0.25472 | 0.37025 | 0.25622 | 0.18695        | 0.65761 |
| rs61777123 | 0.54331 | 0.89069 | 0.30042 | 0.65014        | 0.87944 |
| rs76048468 | 0.60970 | 0.50621 | 0.51787 | 0.44425        | 0.57888 |
| rs12023686 | 0.75478 | 0.48245 | 0.69256 | 0.53523        | 0.45771 |
| rs6424411  | 0.07007 | 0.06182 | 0.46574 | <b>0.02115</b> | 0.27444 |
| rs74986081 | 0.69970 | 0.64317 | 0.55120 | 0.52609        | 0.77881 |

|             |                |                |         |                |                |
|-------------|----------------|----------------|---------|----------------|----------------|
| rs72669163  | 0.69411        | 0.52405        | 0.67515 | 0.44803        | 0.62196        |
| rs578096    | 0.67143        | 0.37613        | 0.90262 | 0.38490        | 0.41776        |
| rs475468    | 0.06428        | <b>0.02295</b> | 0.21563 | 0.16649        | <b>0.02331</b> |
| rs532693    | 0.25123        | 0.11875        | 0.86602 | 0.09665        | 0.17864        |
| rs499641    | 0.58704        | 0.31336        | 0.58105 | 0.61299        | 0.33016        |
| rs41485048  | 0.13497        | 0.19704        | 0.08793 | 0.32726        | 0.12428        |
| rs12410289  | 0.51893        | 0.25246        | 0.76146 | 0.27864        | 0.26286        |
| rs79727162  | 0.11491        | 0.12922        | 0.09334 | 0.24469        | 0.07575        |
| rs12407552  | 0.20420        | 0.16023        | 0.50859 | 0.08265        | 0.34574        |
| rs17090710  | 0.16870        | 0.14316        | 0.46418 | 0.06891        | 0.32270        |
| rs516647    | 0.28204        | 0.37494        | 0.32104 | 0.13294        | 0.84872        |
| rs115764005 | 0.21810        | 0.14728        | 0.26370 | 0.18311        | 0.12390        |
| rs647921    | 0.90895        | 0.82414        | 0.76065 | 0.71858        | 0.93845        |
| rs35316490  | 0.86223        | 0.96926        | 0.59227 | 0.89626        | 0.85546        |
| rs6679370   | 0.12181        | <b>0.04219</b> | 0.36350 | 0.24804        | 0.06168        |
| rs11209730  | <b>0.02333</b> | <b>0.02177</b> | 0.43136 | <b>0.00676</b> | 0.09749        |
| rs1883460   | 0.34828        | 0.91857        | 0.18060 | 0.31168        | 0.55240        |
| rs72671026  | 0.69156        | 0.39405        | 0.77983 | 0.42310        | 0.39273        |
| rs115310839 | 0.78464        | 0.53011        | 0.85697 | 0.49656        | 0.58187        |
| rs2250312   | 0.06308        | <b>0.01990</b> | 0.69822 | <b>0.03909</b> | 0.05357        |
| rs4649933   | 0.91673        | 0.81295        | 0.79727 | 0.71230        | 0.92482        |
| rs2268057   | 0.13837        | 0.05549        | 0.25932 | 0.23174        | 0.05086        |
| rs2268062   | <b>0.03888</b> | <b>0.01642</b> | 0.11642 | 0.32514        | <b>0.01290</b> |
| rs61778876  | <b>0.03169</b> | <b>0.03169</b> |         |                |                |
| rs2421732   | 0.47378        | 0.22621        | 0.63960 | 0.27419        | 0.22586        |
| rs2300175   | <b>0.04168</b> | <b>0.01782</b> | 0.11766 | 0.34138        | <b>0.01383</b> |

|               |            |         |                |         |         |         |
|---------------|------------|---------|----------------|---------|---------|---------|
|               | rs2284362  | 0.29046 | 0.16977        | 0.25978 | 0.42894 | 0.11758 |
|               | rs2284363  | 0.63556 | 0.34453        | 0.89586 | 0.35266 | 0.38221 |
|               | rs10399704 | 0.11879 | <b>0.04310</b> | 0.29370 | 0.39440 | 0.05880 |
|               | rs7524692  | 0.51014 | 0.25187        | 0.87162 | 0.27698 | 0.32421 |
|               | rs9425054  | 0.74068 | 0.88197        | 0.48235 | 0.70410 | 0.94807 |
|               | rs12726996 | 0.22548 | 0.17168        | 0.19937 | 0.26063 | 0.12404 |
|               | rs77691739 | 0.59552 | 0.73192        | 0.31902 | 0.85692 | 0.62521 |
|               | rs10889906 | 0.30440 | 0.40510        | 0.13581 | 0.94766 | 0.18879 |
|               | rs2050065  | 0.50005 | 0.37488        | 0.32742 | 0.61601 | 0.27366 |
| <i>PTGER4</i> | rs13186505 | 0.92538 | 0.76625        | 0.73682 | 0.89993 | 0.70773 |
|               | rs10039983 | 0.82313 | 0.69794        | 0.73570 | 0.53470 | 0.93710 |
|               | rs2228058  | 0.24419 | 0.10065        | 0.51869 | 0.12583 | 0.09317 |
|               | rs4546432  | 0.50262 | 0.78514        | 0.24287 | 0.54388 | 0.41532 |
|               | rs11957406 | 0.71294 | 0.43401        | 0.99338 | 0.50069 | 0.62115 |
|               | rs56277923 | 0.67102 | 0.71742        | 0.48968 | 0.51409 | 0.93899 |
|               | rs13354346 | 0.78072 | 0.48208        | 0.79748 | 0.58897 | 0.52093 |
|               | rs28540420 | 0.40685 | 0.25019        | 0.74030 | 0.18082 | 0.41354 |
|               | rs16870224 | 0.44005 | 0.34890        | 0.27197 | 0.58682 | 0.24547 |

---

**Supplementary Table S2.** Differences in parameters of renal function shown by nephrosclerosis patients according to polymorphisms in the *PTGER3* gene.

| Gene                               | SNP        | Genotype | Mean (SE)       | Mean diff.              | p-value |
|------------------------------------|------------|----------|-----------------|-------------------------|---------|
| eGFR (ml/min/1.73 m2)              |            |          |                 |                         |         |
| PTGER3                             | rs61777096 | G/G      | 36.95 (0.82)    | 2.11 (0.48 - 3.74)      | 0.012   |
|                                    |            | A/G-A/A  | 36.61 (1.24)    |                         |         |
|                                    | rs6656853  | C/C      | 36.38 (1.07)    | 1.64 (0.09 - 3.18)      | 0.038   |
|                                    |            | T/C-T/T  | 37.20 (0.89)    |                         |         |
|                                    | rs6424406  | T/T      | 37.38 (0.75)    | -3.28 (-5.33 -1.23)     | 0.002   |
|                                    |            | C/T-C/C  | 34.55 (1.59)    |                         |         |
|                                    | rs1409986  | G/G      | 37.21 (0.75)    | -3.94 (-6.04 -1.84)     | 0.0006  |
|                                    |            | A/G-A/A  | 33.95 (1.64)    |                         |         |
|                                    | rs1536261  | C/C      | 39.28 (1.06)    | -2.52 (-4.04 -0.99)     | 0.001   |
|                                    |            | A/C-A/A  | 34.96 (0.88)    |                         |         |
|                                    | rs11209708 | A/A      | 37.20 (0.78)    | -2.63 (-4.43 -0.83)     | 0.004   |
|                                    |            | G/A-G/G  | 35.07 (1.39)    |                         |         |
|                                    | rs1409165  | A/A      | 37.44 (0.83)    | -2.86 (-4.49 -1.23)     | 0.0006  |
|                                    |            | G/A-G/G  | 35.06 (1.21)    |                         |         |
|                                    | rs1327464  | G/G      | 35.78 (1.02)    | 2.07 (0.55 - 3.59)      | 0.008   |
|                                    |            | A/G-A/A  | 37.42 (0.93)    |                         |         |
|                                    | rs2182325  | G/G      | 39.29 (0.99)    | -2.81 (-4.33 -1.29)     | 0.0003  |
|                                    |            | A/G-A/A  | 35.20 (0.90)    |                         |         |
|                                    | rs475468   | G/G      | 38.04 (1.05)    | -1.81 (-3.34 -0.26)     | 0.022   |
|                                    |            | A/G-A/A  | 36.09 (0.89)    |                         |         |
| Albumin-to-creatinine ratio (mg/g) |            |          |                 |                         |         |
| PTGER3                             | rs61777096 | G/G      | 281.6 (45.26)   | 192.95 (16.57 - 369.30) | 0.033   |
|                                    |            | A/G-A/A  | 460.6 (93.07)   |                         |         |
|                                    | rs6656853  | C/C      | 250.6 (47.59)   | 170 (6.45 - 335.40)     | 0.043   |
|                                    |            | T/C-T/T  | 399.6 (64.45)   |                         |         |
|                                    | rs875727   | T/T      | 296.04 (42.93)  | 263 (43.29 - 482.8)     | 0.019   |
|                                    |            | C/T-C/C  | 553.41 (133.01) |                         |         |

SE, standard error; Mean diff., mean difference with 95% confidence interval

**Supplementary Table S3.** Differences in blood pressure traits shown by nephrosclerosis patients according to polymorphisms in *PTGER* genes.

| Gene                           | SNP        | Genotype | Mean (SE)    | Mean diff.           | p-value |
|--------------------------------|------------|----------|--------------|----------------------|---------|
| Sistolic blood pressure (SBP)  |            |          |              |                      |         |
| PTGER3                         | rs17481440 | C/C      | 145.4 (1.03) | 5.54 (0.4 10.67)     | 0.035   |
|                                |            | C/T-T/T  | 151.1 (2.09) |                      |         |
|                                | rs1536261  | C/C      | 149.6 (1.49) | -5.43 (-9.26 -1.61)  | 0.006   |
|                                |            | C/A-A/A  | 144.2 (1.23) |                      |         |
|                                | rs4649932  | A/A      | 148.4 (1.29) | -4.72 (-8.44 -0.99)  | 0.013   |
|                                |            | A/G-G/G  | 143.5 (1.39) |                      |         |
|                                | rs2182325  | G/G      | 148.4 (1.39) | -4.05 (-7.75 -0.34)  | 0.033   |
|                                |            | G/A-A/A  | 144.3 (1.27) |                      |         |
|                                | rs61777123 | T/T      | 145.1 (1.06) | 4.45 (0.11 - 8.79)   | 0.045   |
|                                |            | T/G-G/G  | 149.5 (2.04) |                      |         |
|                                | rs578096   | C/C      | 145 (1.08)   | 4.33 (0.27 - 8.38)   | 0.037   |
|                                |            | C/T-T/T  | 149.2 (1.87) |                      |         |
|                                | rs35316490 | A/A      | 147.6 (1.08) | -6.36 (-10.83 -1.89) | 0.005   |
|                                |            | A/G-G/G  | 141.7 (1.96) |                      |         |
|                                | rs2250312  | C/C      | 148.9 (1.61) | -4.87 (-8.65 -1.09)  | 0.012   |
|                                |            | C/T-T/T  | 144.4 (1.13) |                      |         |
|                                | rs4649933  | T/T      | 148.4 (1.23) | -5.5 (-9.22 -1.78)   | 0.004   |
|                                |            | T/C-C/C  | 143 (1.44)   |                      |         |
|                                | rs2421732  | C/C      | 144.9 (1.06) | 4.76 (0.6 - 8.93)    | 0.025   |
|                                |            | C/T-T/T  | 149.5 (1.94) |                      |         |
|                                | rs2284362  | C/C      | 148.8 (1.38) | -5.27 (-8.95 -1.61)  | 0.005   |
|                                |            | C/T-T/T  | 143.7 (1.25) |                      |         |
|                                | rs2284363  | T/T      | 148.1 (1.11) | -7.41 (-11.52 -3.29) | 0.0005  |
|                                |            | T/C-C/C  | 141 (1.68)   |                      |         |
| Diastolic blood pressure (DBP) |            |          |              |                      |         |
| PTGER3                         | rs7533733  | A/A      | 82.75 (0.82) | -2.16 (-4.17 -0.14)  | 0.036   |
|                                |            | A/G-G/G  | 80.31 (0.64) |                      |         |
|                                | rs4649932  | A/A      | 82.4 (0.71)  | -2.69 (-4.68 -0.71)  | 0.008   |

|                       |             |         |              |                     |       |
|-----------------------|-------------|---------|--------------|---------------------|-------|
|                       |             | A/G-G/G | 79.83 (0.74) |                     |       |
|                       | rs35702222  | A/A     | 82.19 (0.65) | -2.29 (-4.28 -0.31) | 0.024 |
|                       |             | A/G-G/G | 79.88 (0.78) |                     |       |
|                       | rs115764005 | G/G     | 80.86 (0.53) | 4.39 (0.55 - 8.24)  | 0.025 |
|                       |             | G/A-A/A | 85.68 (1.93) |                     |       |
|                       | rs4649933   | T/T     | 82.42 (0.66) | -3.01 (-4.99 -1.02) | 0.003 |
|                       |             | T/C-C/C | 79.44 (0.78) |                     |       |
|                       | rs2284362   | C/C     | 82.14 (0.69) | -2.06 (-4.02 -0.11) | 0.039 |
|                       |             | C/T-T/T | 80.37 (0.73) |                     |       |
|                       | rs2284363   | T/T     | 82.04 (0.58) | -3.13 (-5.32 -0.93) | 0.005 |
|                       |             | T/C-C/C | 79.14 (0.98) |                     |       |
|                       | rs9425054   | A/A     | 81.75 (0.58) | -2.29 (-4.52 -0.07) | 0.044 |
|                       |             | A/G-G/G | 79.54 (1.03) |                     |       |
|                       | rs77691739  | A/A     | 81.73 (0.56) | -2.92 (-5.52 -0.32) | 0.028 |
|                       |             | A/G-G/G | 78.51 (1.21) |                     |       |
| PTGER4                | rs16870224  | G/G     | 81.82 (0.61) | -2.3 (-4.57 -0.03)  | 0.048 |
|                       |             | G/A-A/A | 79.5 (0.96)  |                     |       |
| <hr/>                 |             |         |              |                     |       |
| <i>Pulse pressure</i> |             |         |              |                     |       |
| PTGER3                | rs6424406   | T/T     | 65.96 (0.86) | -4.68 (-8.70 -0.67) | 0.022 |
|                       |             | T/C-C/C | 60.90 (2.02) |                     |       |
|                       | rs1536261   | C/C     | 67.46 (1.21) | -3.84 (-6.97 -0.71) | 0.017 |
|                       |             | C/A-A/A | 63.58 (1.06) |                     |       |
|                       | rs11209708  | A/A     | 65.80 (0.89) | -3.73 (-7.41 -0.06) | 0.047 |
|                       |             | A/G-G/G | 62.42 (1.83) |                     |       |
|                       | rs1409165   | A/A     | 66.20 (0.96) | -3.85 (-7.16 -0.54) | 0.023 |
|                       |             | A/G-G/G | 62.44 (1.47) |                     |       |
|                       | rs35316490  | A/A     | 65.85 (0.92) | -4.36 (-8.04 -0.68) | 0.021 |
|                       |             | A/G-G/G | 61.99 (1.62) |                     |       |
|                       | rs2250312   | C/C     | 66.86 (1.31) | -3.36 (-6.46 -0.26) | 0.034 |
|                       |             | C/T-T/T | 63.67 (0.98) |                     |       |
|                       | rs2284362   | C/C     | 66.63 (1.13) | -3.21 (-6.23 -0.19) | 0.038 |
|                       |             | C/T-T/T | 63.31 (1.09) |                     |       |
|                       | rs2284363   | T/T     | 66.04 (0.93) | -4.28 (-7.67 -0.88) | 0.014 |
|                       |             | T/C-C/C | 61.85 (1.47) |                     |       |

SE, standard error; Mean diff., mean difference with 95% confidence interval

**Supplementary Table S4.** Cox regression analyses modelling the risk of cardiovascular events in nephrosclerosis patients according to relevant genotypes.

|                 | <b>B</b> | <b>SE</b> | <b>Wald</b> | <b>HR</b> | <b>CI</b> |       | <b>p-value</b> |
|-----------------|----------|-----------|-------------|-----------|-----------|-------|----------------|
| rs2241360 AA/AG | -1.051   | 0.48      | 4.792       | 0.35      | 0.137     | 0.896 | 0.029          |
| Sex             | 1.114    | 0.441     | 6.394       | 3.047     | 1.285     | 7.224 | 0.011          |
| Age             | 0.052    | 0.023     | 5.205       | 1.053     | 1.007     | 1.101 | 0.023          |
| diabetes        | 0.619    | 0.317     | 3.825       | 1.857     | 0.999     | 3.454 | 0.05           |
| Hypertension    | -0.293   | 0.731     | 0.161       | 0.746     | 0.178     | 3.125 | 0.689          |
| rs7533733 GG    | 0.871    | 0.343     | 6.461       | 2.39      | 1.221     | 4.678 | 0.011          |
| Sex             | 0.992    | 0.413     | 5.773       | 2.695     | 1.2       | 6.052 | 0.016          |
| Age             | 0.043    | 0.021     | 4.143       | 1.044     | 1.002     | 1.089 | 0.042          |
| Diabetes        | 0.736    | 0.315     | 5.446       | 2.087     | 1.125     | 3.871 | 0.02           |
| Hypertension    | -0.077   | 0.725     | 0.011       | 0.926     | 0.224     | 3.836 | 0.916          |

B, regression coefficient; SE, standard error; HR, hazard ratio; CI, 95% confidence interval.
